# Supplementary material
Source: publisher figshare collection journal article supplement (https://acs.figshare.com/ndownloader/files/15316676)
Supplement: Supplementary file 1 [file 15316676]

# Supporting Information

## **A Cathode-Integrated Sulfur-Deficient Co<sub>9</sub>S<sub>8</sub> Catalytic Interlayer for the Reutilization of “Lost” Polysulfides in Lithium-Sulfur Batteries**

**Haibin Lin, Shengliang Zhang, Tianran Zhang, Sheng Cao, Hualin Ye, Qiaofeng Yao, Guangyuan Wesley Zheng\* and Jim Yang Lee\***

Department of Chemical and Biomolecular Engineering, National University of Singapore, 10 Kent Ridge Crescent, Singapore 119260, Singapore.

Corresponding addresses: cheleejy@nus.edu.sg; chezg@nus.edu.sg

**Table S1** Elemental compositions of Co<sub>9</sub>S<sub>8</sub>/CNT treated at different temperature in hydrogen.

|        | precursor | 500 °C | 700 °C | 900 °C |
|--------|-----------|--------|--------|--------|
| Co (%) | 52.89     | 55.84  | 60.11  | 66.16  |
| S (%)  | 47.11     | 44.16  | 39.89  | 33.84  |

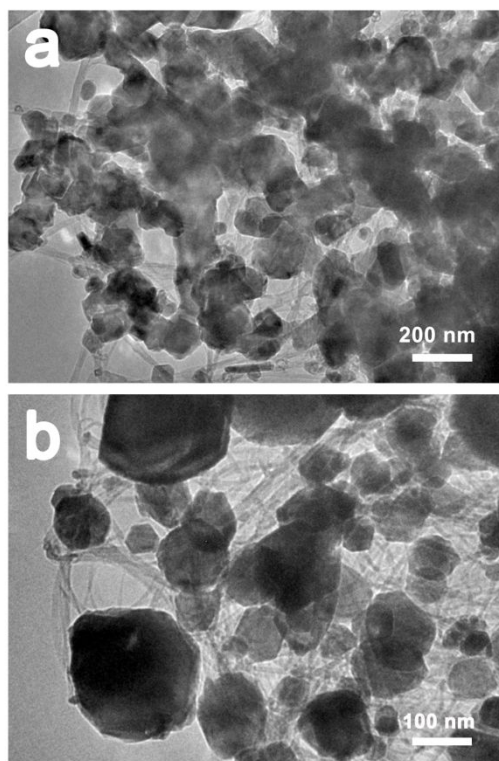

**Figure S1.** TEM image of Co<sub>9</sub>S<sub>8</sub>/CNT composite heat-treated at 900 °C in hydrogen.

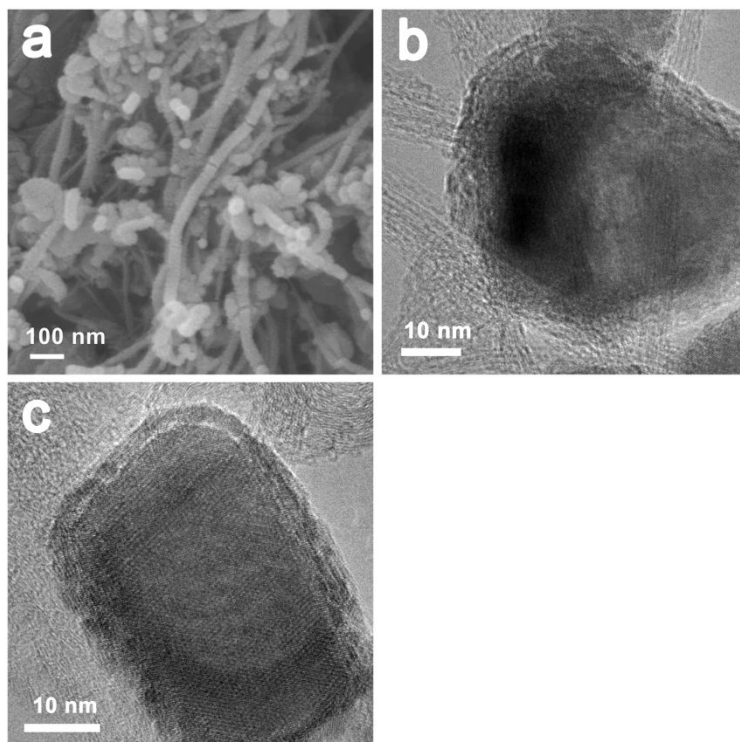

**Figure S2.** (a) FESEM and (b-c) TEM images of the Co<sub>9</sub>S<sub>8-x</sub>/CNT prepared by heating Co<sub>9</sub>S<sub>8</sub>/CNT composite at 700 °C in hydrogen.

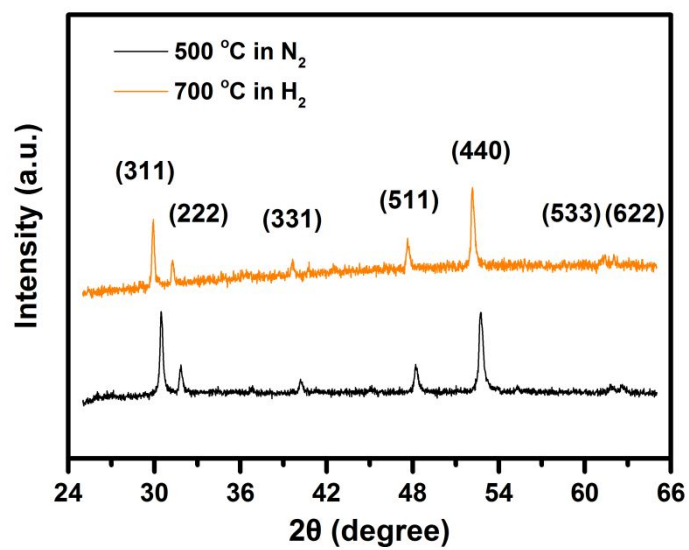

**Figure S3.** XRD pattern of the Co<sub>9</sub>S<sub>8</sub>/CNT treated at 500 °C in nitrogen and at 700 °C in hydrogen atmosphere.

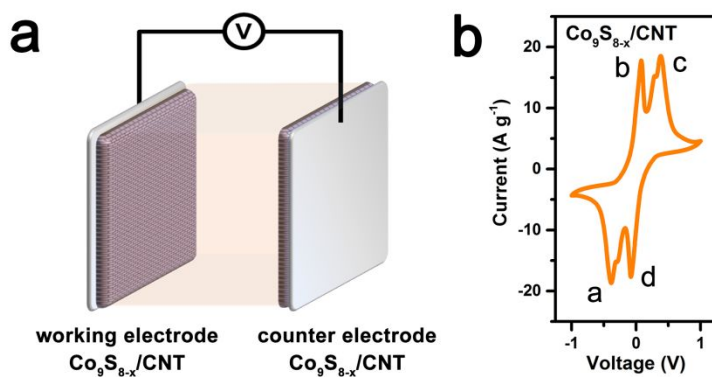

**C**

**Peak a**

Reaction on working electrode:  $\text{S}_6^{2-} + 10\text{e}^- + 12\text{Li}^+ \rightarrow 6\text{Li}_2\text{S}$

Reaction on counter electrode:  $4\text{S}_6^{2-} - 8\text{e}^- \rightarrow 3\text{S}_8$

**Peak b**

Reaction on working electrode:  $6\text{Li}_2\text{S} - 10\text{e}^- \rightarrow \text{S}_6^{2-} + 12\text{Li}^+$

Reaction on counter electrode:  $3\text{S}_8 + 8\text{e}^- \rightarrow 4\text{S}_6^{2-}$

**Peak c**

Reaction on working electrode:  $4\text{S}_6^{2-} - 8\text{e}^- \rightarrow 3\text{S}_8$

Reaction on counter electrode:  $\text{S}_6^{2-} + 10\text{e}^- + 12\text{Li}^+ \rightarrow 6\text{Li}_2\text{S}$

**Peak d**

Reaction on working electrode:  $3\text{S}_8 + 8\text{e}^- \rightarrow 4\text{S}_6^{2-}$

Reaction on counter electrode:  $6\text{Li}_2\text{S} - 10\text{e}^- \rightarrow \text{S}_6^{2-} + 12\text{Li}^+$

**Figure S4.** (a) Schematic of a symmetric cell, (b) cyclic voltammograms of the symmetric cell with a  $\text{Co}_9\text{S}_{8-x}/\text{CNT}$  catalyst and (c) illustration of the electrode reactions for the redox peaks.

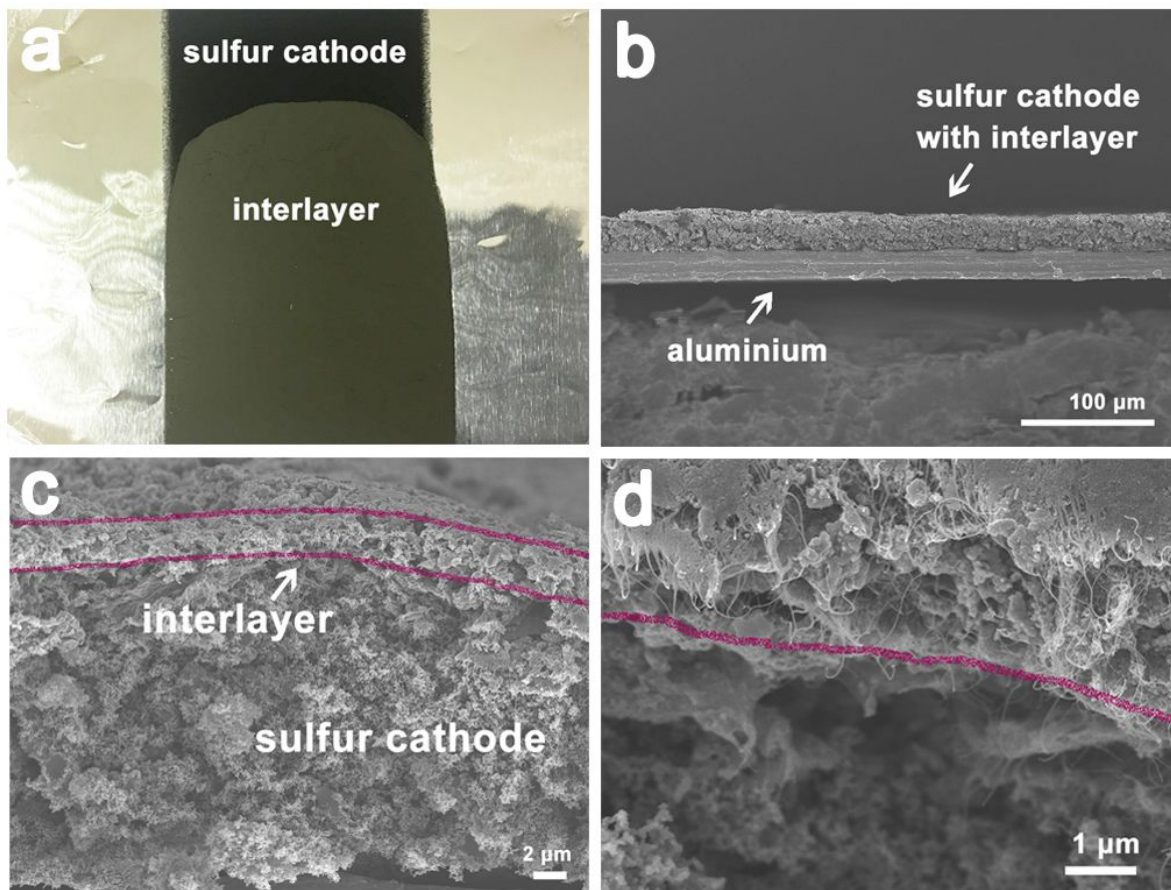

**Figure S5.** Characterization of the  $\text{Co}_9\text{S}_{8-x}/\text{CNT}$  interlayer on the sulfur cathode. (a) Photograph and (b-d) FESEM images of the sulfur cathode with  $\text{Co}_9\text{S}_{8-x}/\text{CNT}$  interlayer.

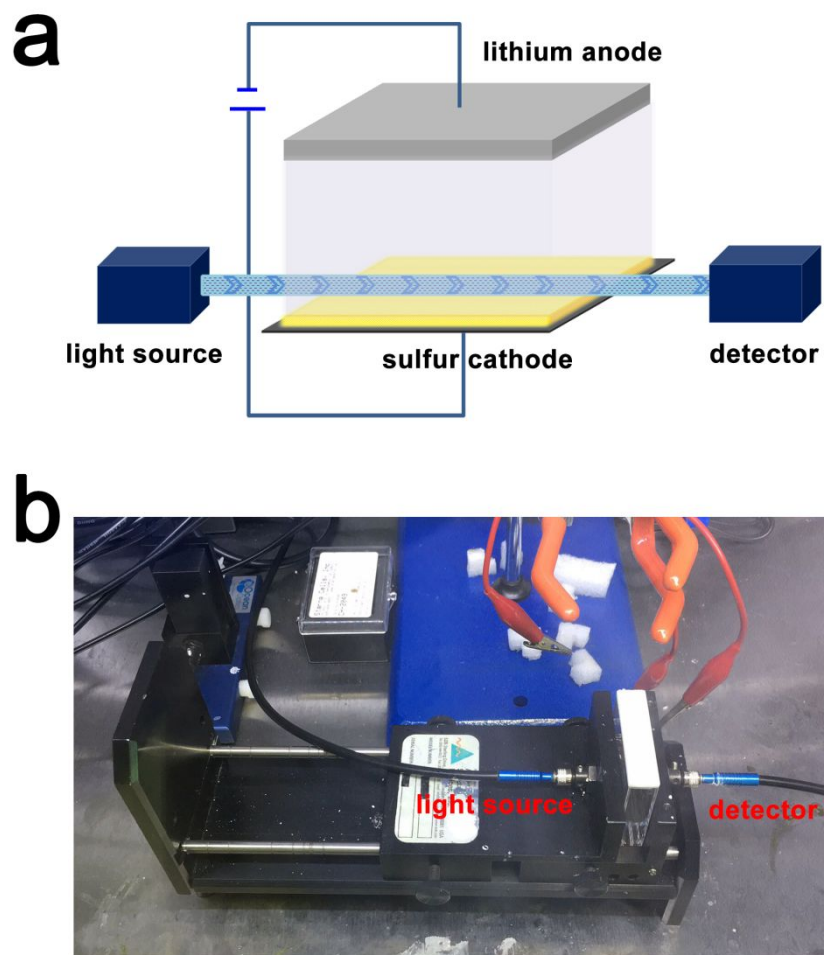

**Figure S6.** (a) Schematic of the *in-situ* UV-vis spectroscopy measurement setup and (b) a digital photo of the setup.



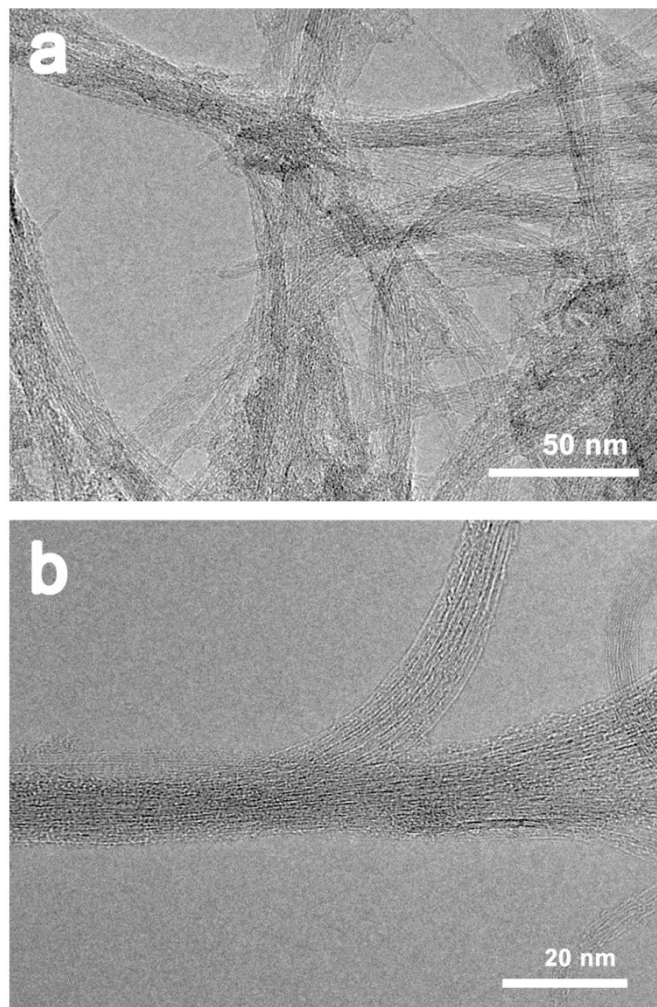

**Figure S7.** TEM images of CNT heated at 700 °C in hydrogen.

The 1D nanostructure entanglement not only inhibited the aggregation of  $\text{Co}_9\text{S}_8$ , but also increased the polysulfide encounter and the capture efficiency.

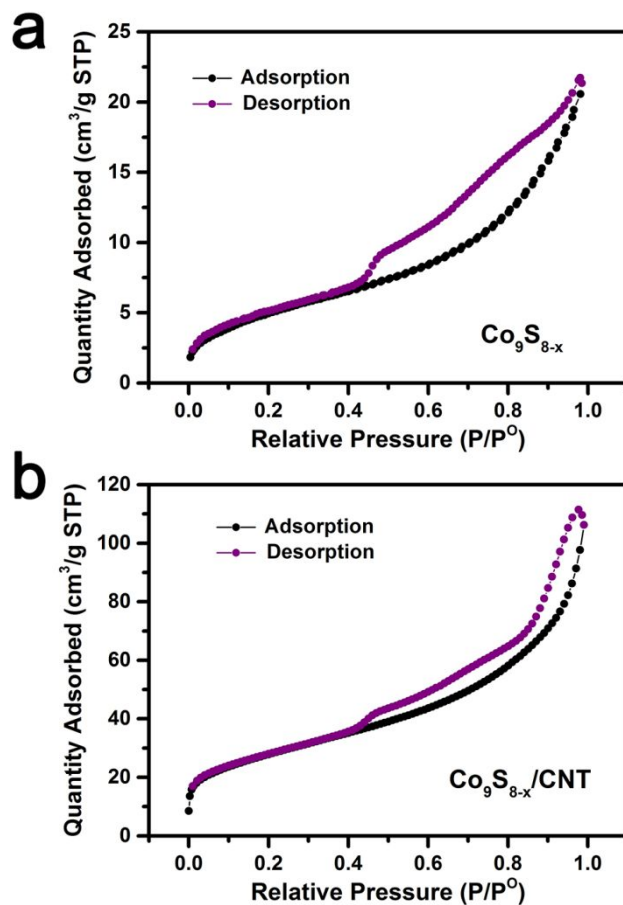

**Figure S8.** N<sub>2</sub> adsorption and desorption isotherms of (a) Co<sub>9</sub>S<sub>8-x</sub> and (b) Co<sub>9</sub>S<sub>8-x</sub>/CNT.

The surface areas of Co<sub>9</sub>S<sub>8-x</sub> and Co<sub>9</sub>S<sub>8-x</sub>/CNT are 18.94 m<sup>2</sup>/g and 100.91 m<sup>2</sup>/g respectively. The larger surface area of the latter may be attributed to the high surface area of CNT; and the CNT as the catalyst support to sustain a high dispersion of Co<sub>9</sub>S<sub>8-x</sub> nanoparticles without much aggregation (see TEM images in Figure 2b). The large surface area and better contact with polysulfides are conducive to the polysulfide conversion reactions.

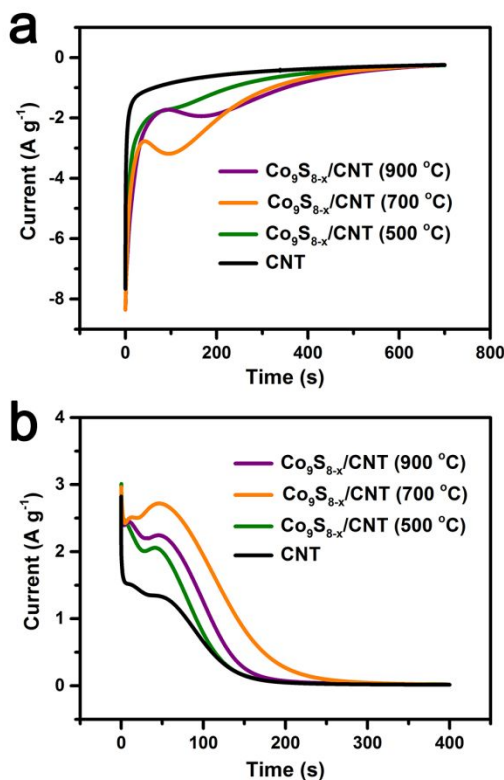

**Figure S9.** Evaluation of the polysulfide conversion kinetics on samples prepared at different temperatures. (a) Current time responses from potentiostatic discharge from the open circuit condition (2.2 V) to 2 V and (b) Current-time responses from potentiostatic recharge to 2.4 V.

The electrochemical properties of samples prepared at different temperatures can be deduced from their reaction kinetics with sulfur (or Li<sub>2</sub>S). Potentiostatic discharge and recharge were used to evaluate the polysulfide conversion kinetics. The results are given in Figure S9 below. The current in potentiostatic discharge was contributed by the deposition of Li<sub>2</sub>S on the catalyst (Figure S9a), while the current in potentiostatic charge was contributed by the deposition of sulfur on the catalyst (Figure S9b). Higher currents were measured from the Co<sub>9</sub>S<sub>8-x</sub>/CNT (700 °C) sample in both potentiostatic discharge and charge; indicating accelerated deposition kinetics of Li<sub>2</sub>S and sulfur. The measurements confirmed the catalytic effects of sulfur deficiencies on both polysulfide reduction and oxidation reactions. Although Co<sub>9</sub>S<sub>8-x</sub>/CNT (900 °C) had more sulfur deficiencies on the surface, the high temperature treatment also caused more extensive particle aggregation to result in an overall poor electrochemical performance. Hence, the Co<sub>9</sub>S<sub>8-x</sub>.

$_x/\text{CNT}$  (700 °C) sample with the next highest sulfur deficiency content was selected for detailed follow-up investigations.

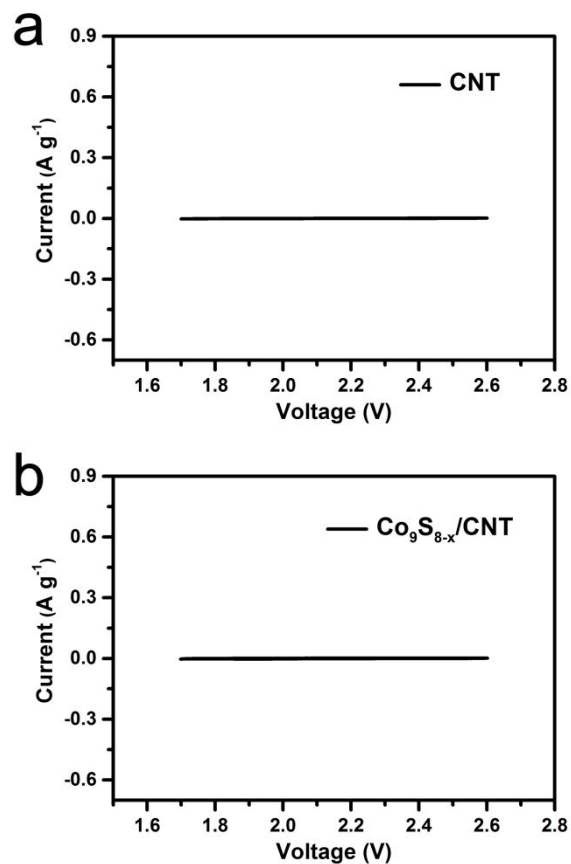

**Figure S10.** Cyclic voltammograms of the lithium-catalyst cells without polysulfide in the electrolyte at  $0.1 \text{ mV s}^{-1}$  in 1.7 V-2.6 V.

No peaks appeared in the cyclic voltammograms of lithium-catalyst cells without the polysulfide, indicating that  $\text{Co}_9\text{S}_{8-x}$  and CNT did not contribute to the redox reactions in Figure 3e.

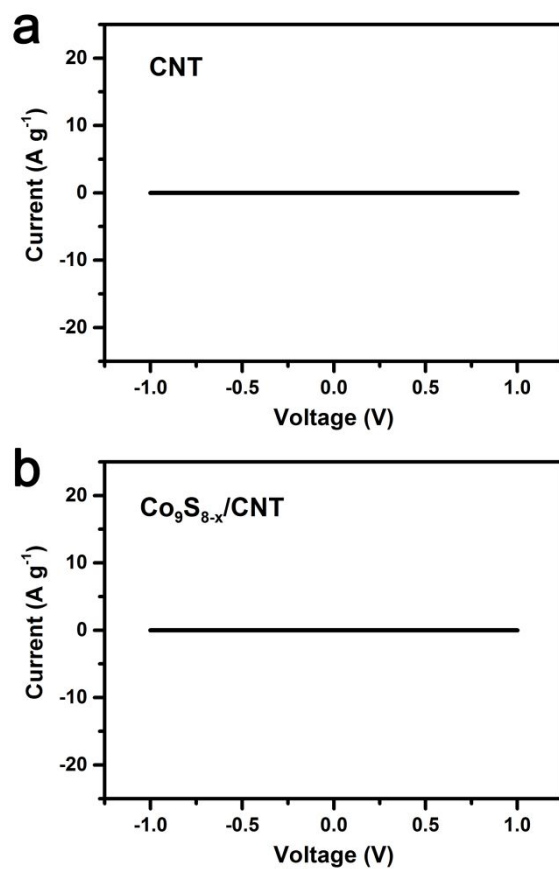

**Figure S11.** Cyclic voltammograms of symmetric cells without polysulfide in the electrolyte.

No peaks appeared in the cyclic voltammograms of symmetric cells without the polysulfide, indicating that the Co<sub>9</sub>S<sub>8-x</sub> and CNT did not contribute to the redox reactions in Figure 4a.

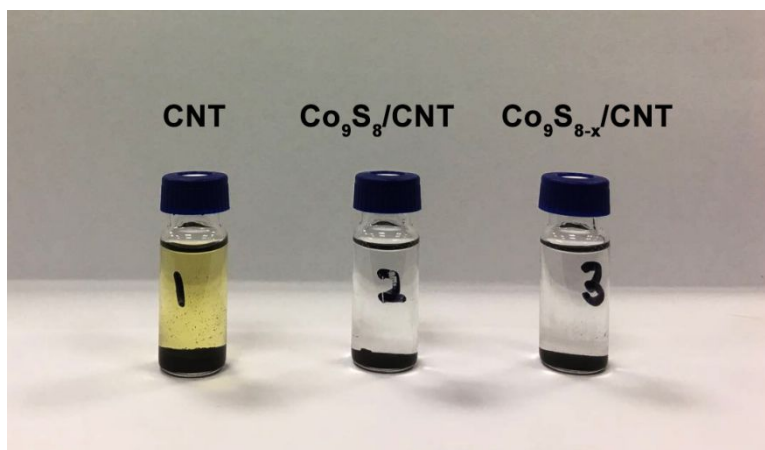

**Figure S12.** Adsorption uptake of  $\text{Li}_2\text{S}_6$  solution ( $2.5 \text{ mmol L}^{-1}$  in 1:1 (v/v) DME/DOL) by the same amount of  $\text{Co}_9\text{S}_8/\text{CNT}$  and  $\text{Co}_9\text{S}_{8-x}/\text{CNT}$ .

Both composites were equally adept at polysulfide uptake (Figure S12). However, the sulfur cathode with sulfur-deficient  $\text{Co}_9\text{S}_{8-x}/\text{CNT}$  delivered notably better performance in symmetric cells. Adsorption is the first step in overall catalysis; and the performance difference between  $\text{Co}_9\text{S}_8/\text{CNT}$  and sulfur-deficient  $\text{Co}_9\text{S}_{8-x}/\text{CNT}$  could only be caused by post-adsorption reaction steps.

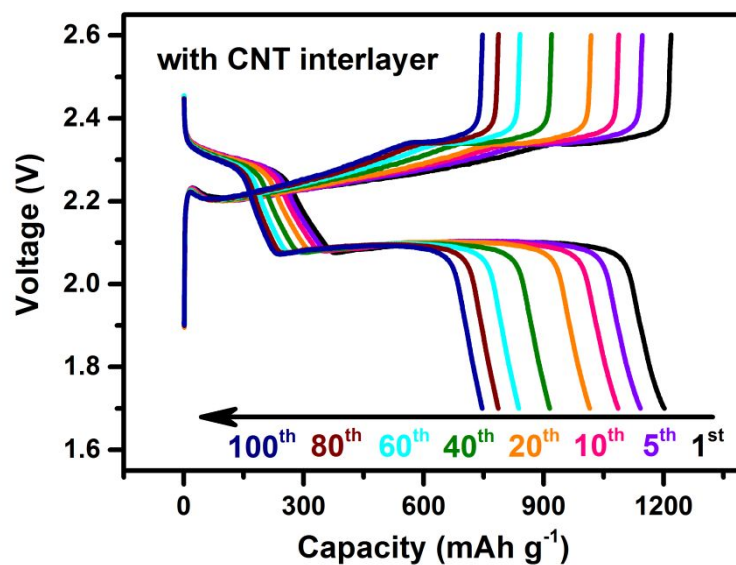

**Figure S13.** Galvanostatic charge-discharge curves of a lithium-sulfur battery with a CNT interlayer at 0.3 C for 100 cycles.

There were no redox features at  $\sim 1.9$  V during discharge and at  $\sim 2.2$  V during recharge, indicating that the redox features were only accessible in the presence of the  $\text{Co}_9\text{S}_{8-x}$  catalyst.

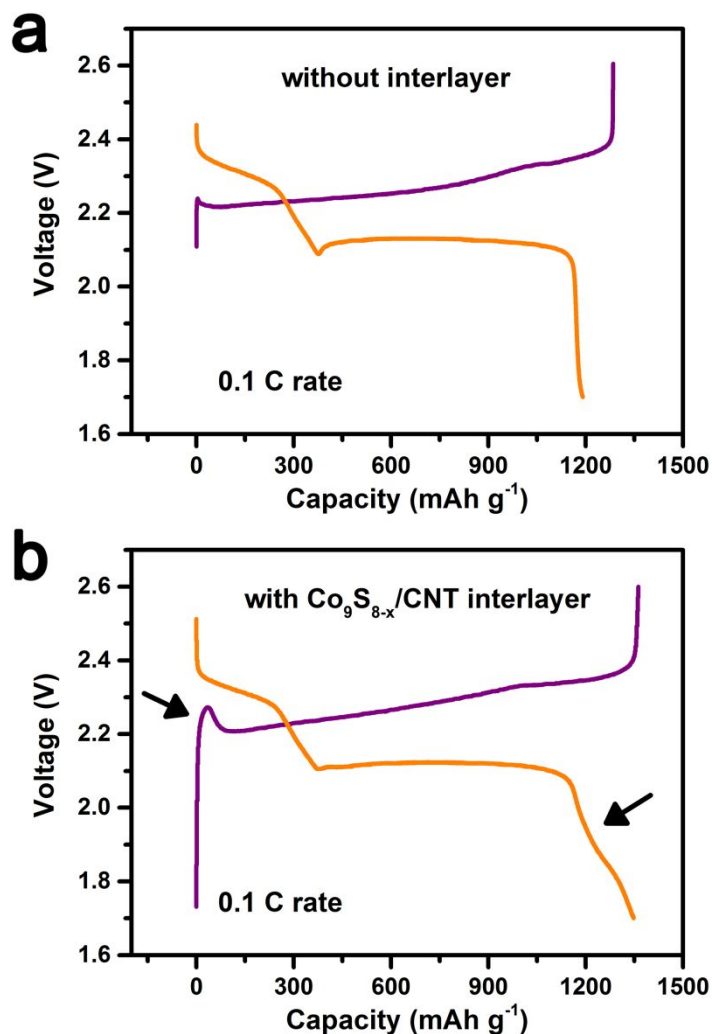

**Figure S14.** Galvanostatic charge-discharge curves of the lithium-sulfur battery with and without a Co<sub>9</sub>S<sub>8-x</sub>/CNT interlayer at 0.1 C.

The discharge plateaus at about 2.3 V and 2.0 V are typical of sulfur reduction to soluble long-chain polysulfides (Li<sub>2</sub>S<sub>x</sub>, 4 ≤ x ≤ 8), and the formation of insoluble end products (Li<sub>2</sub>S<sub>2</sub>/Li<sub>2</sub>S) respectively. The two plateaus in the charge curve at about 2.3 V and 2.4 V are reverse of these reactions which converted Li<sub>2</sub>S<sub>2</sub>/Li<sub>2</sub>S to sulfur. There is clearly less potential hysteresis in the sulfur cathode with an integrated Co<sub>9</sub>S<sub>8-x</sub>/CNT interlayer.



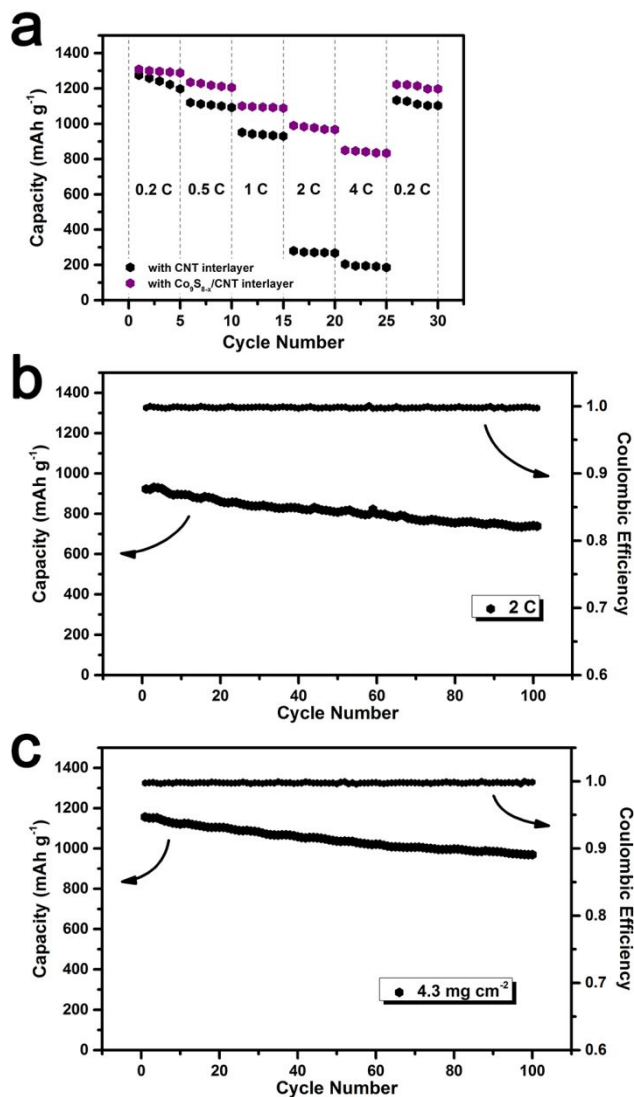

**Figure S15.** Electrochemical performances of lithium-sulfur batteries with a  $\text{Co}_9\text{S}_{8-x}/\text{CNT}$  catalytic interlayer. (a) Rate performance at different C-rates. Cycle stability (b) at the 2C rate and (c) with high sulfur-loading cathode at the 0.3C rate.

At the 0.2C rate, the initial discharge capacity of a sulfur cathode with the  $\text{Co}_9\text{S}_{8-x}/\text{CNT}$  catalytic interlayer was 1308.9  $\text{mAh g}^{-1}$ , slightly higher than that of a sulfur cathode with the CNT interlayer (1274.9  $\text{mAh g}^{-1}$ , Figure S15a). The capacity difference increased noticeably at higher C-rates. Consequently, a sulfur cathode with the  $\text{Co}_9\text{S}_{8-x}/\text{CNT}$  catalytic interlayer could deliver a much higher capacity (849.7  $\text{mAh g}^{-1}$ ) than a sulfur cathode with only a CNT interlayer (204.3  $\text{mAh g}^{-1}$ ).

The cycle stability of a Li-S cell with the  $\text{Co}_9\text{S}_{8-x}/\text{CNT}$  catalytic interlayer at the 2C rate is shown in Figure S15b. Cycle stability remained good even at this ten-fold increase in the C-rate (from 0.2C) - the Li-S cell could still provide  $742.3 \text{ mAh g}^{-1}$  of capacity after 100 cycles (80.4% initial capacity retention).

The Li-S cell with a high sulfur-loading cathode ( $4.3 \text{ mg cm}^{-2}$ ) and the  $\text{Co}_9\text{S}_{8-x}/\text{CNT}$  catalytic interlayer could also deliver  $969.5 \text{ mAh g}^{-1}$  after 100 cycles at the 0.3C rate (83.8% of initial capacity retention, Figure S15c).

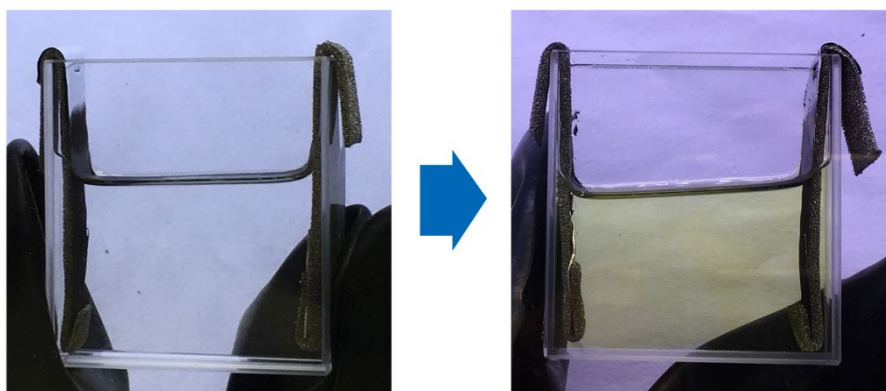

**Figure S16.** Photograph of the cell with sulfur cathode coated with CNT interlayer before and after test.

The CNT interlayer was unable to inhibit the diffusion of polysulfides from the cathode after the cell was discharged potentiostatically to 1.7 V for 12 min.

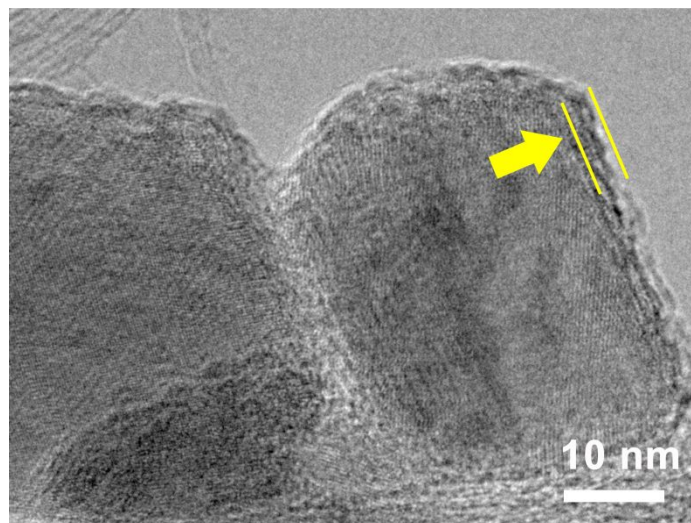

**Figure S17.** TEM image of the Co<sub>9</sub>S<sub>8-x</sub>/CNT in the cathode interlayer after 20 cycles.

**Table S2** Comparison of the  $\text{Co}_9\text{S}_{8-x}/\text{CNT}$  interlayer with other lithium-sulfur battery interlayer in the literature.

| Sulfur cathode interlayer                                        | Initial capacity                    | Cycling performance                         | Capacity fade rate | Cathode (Sulfur wt%)                                     | Reference |
|------------------------------------------------------------------|-------------------------------------|---------------------------------------------|--------------------|----------------------------------------------------------|-----------|
| $\text{Ti}_3\text{C}_2$ Mxene nanosheets                         | 899 mAh g <sup>-1</sup> (0.5 C)     | 428.8 mAh g <sup>-1</sup> after 200 cycles  | 0.26% per cycle    | $\text{Ti}_3\text{C}_2$ Mxene nanoribbon/ Sulfur (47.6%) | 1         |
| nanocrystalline niobium carbide                                  | 1082 mAh g <sup>-1</sup> (0.5 C)    | 872 mAh g <sup>-1</sup> after 150 cycles    | 0.13% per cycle    | sulfur (60%)                                             | 2         |
| boron nitride nanosheets/ graphene                               | 1100 mAh g <sup>-1</sup> (1 C)      | 700 mAh g <sup>-1</sup> after 1000 cycles   | 0.036% per cycle   | sulfur (70%)                                             | 3         |
| ultrathin $\text{MnO}_2$ /graphene /carbon nanotube              | 960 mAh g <sup>-1</sup> (1 C)       | 293 mAh g <sup>-1</sup> after 2500 cycles   | 0.029% per cycle   | Sulfur/CNT (60%-80%)                                     | 4         |
| ultralight multiwall carbon nanotube/ N-doped carbon quantum dot | 1330.8 mAh g <sup>-1</sup> (0.5 C)  | 650.7 mAh g <sup>-1</sup> after 500 cycles  | 0.102% per cycle   | sulfur (54%)                                             | 5         |
| $\text{WS}_2$ /carbon cloth                                      | 1493.7 mAh g <sup>-1</sup> (0.05 C) | 1201 mAh g <sup>-1</sup> after 100 cycles   | 0.19% per cycle    | sulfur (70%)                                             | 6         |
| laponite nanosheets/carb on black                                | 1199.5 mAh g <sup>-1</sup> (0.2 C)  | 838 mAh g <sup>-1</sup> after 500 cycles    | 0.06% per cycle    | sulfur (70%)                                             | 7         |
| ZnO nanowires/Ni foam                                            | 712.5 mAh g <sup>-1</sup> (2 C)     | 577.1 mAh g <sup>-1</sup> after 500 cycles  | 0.038% per cycle   | sulfur/MW CNT (70%)                                      | 8         |
| $\text{Co}_9\text{S}_{8-x}/\text{CNT}$                           | 1272.9 mAh g <sup>-1</sup> (0.3 C)  | 648.5 mAh g <sup>-1</sup> after 1000 cycles | 0.049% per cycle   | sulfur (70%)                                             | this work |

## REFERENCES

- (1) Dong, Y.; Zheng, S.; Qin, J.; Zhao, X.; Shi, H.; Wang, X.; Chen, J.; Wu, Z. S., All-Mxene-Based Integrated Electrode Constructed by  $\text{Ti}_3\text{C}_2$  Nanoribbon Framework Host and Nanosheet Interlayer for High-Energy-Density Li-S Batteries. *ACS Nano* **2018**, *12*, 2381-2388.
- (2) Cai, W.; Li, G.; Zhang, K.; Xiao, G.; Wang, C.; Ye, K.; Chen, Z.; Zhu, Y.; Qian, Y., Conductive Nanocrystalline Niobium Carbide as High-Efficiency Polysulfides Tamer for Lithium-Sulfur Batteries. *Adv. Funct. Mater.* **2018**, *28*, 1704865.
- (3) Fan, Y.; Yang, Z.; Hua, W.; Liu, D.; Tao, T.; Rahman, M. M.; Lei, W.; Huang, S.; Chen, Y., Functionalized Boron Nitride Nanosheets/Graphene Interlayer for Fast and Long-Life Lithium-Sulfur Batteries. *Adv. Energy Mater.* **2017**, *7*, 1602380.
- (4) Kong, W.; Yan, L.; Luo, Y.; Wang, D.; Jiang, K.; Li, Q.; Fan, S.; Wang, J., Ultrathin  $\text{MnO}_2$ /Graphene Oxide/Carbon Nanotube Interlayer as Efficient Polysulfide-Trapping Shield for High-Performance Li-S Batteries. *Adv. Funct. Mater.* **2017**, *27*, 1606663.
- (5) Pang, Y.; Wei, J.; Wang, Y.; Xia, Y., Synergetic Protective Effect of the Ultralight Mwcnts/Ncqds Modified Separator for Highly Stable Lithium-Sulfur Batteries. *Adv. Energy Mater.* **2018**, *8*, 1702288.
- (6) Park, J.; Yu, B.-C.; Park, J. S.; Choi, J. W.; Kim, C.; Sung, Y.-E.; Goodenough, J. B., Tungsten Disulfide Catalysts Supported on a Carbon Cloth Interlayer for High Performance Li-S Battery. *Adv. Energy Mater.* **2017**, *7*, 1602567.
- (7) Yang, Y.; Zhang, J., Highly Stable Lithium-Sulfur Batteries Based on Laponite Nanosheet-Coated Celgard Separators. *Adv. Energy Mater.* **2018**, *8*, 1801778.
- (8) Zhao, T.; Ye, Y.; Peng, X.; Divitini, G.; Kim, H.-K.; Lao, C.-Y.; Coxon, P. R.; Xi, K.; Liu, Y.; Ducati, C.; Chen, R.; Kumar, R. V., Advanced Lithium-Sulfur Batteries Enabled by a Bio-Inspired Polysulfide Adsorptive Brush. *Adv. Funct. Mater.* **2016**, *26*, 8418-8426.
